# Supplementary material for: Unique Neoantigens Arise from Somatic Mutations in Patients with Gastrointestinal Cancers
Source: Oxford University Press journal article supplement (doi:10.1158/2159-8290.cd-18-1494), 2019-06-04
Supplement: 21598290cd181494-sup-214162_2_supp_5551282_ps8cdj.doc [file 21598290cd181494-sup-214162_2_supp_5551282_ps8cdj.doc]

Supplementary Table 1. Patient characteristics

|  | No. of patients | % |
| --- | --- | --- |
| Patients | 75 |  |
| Sex  Female  Male | 47 28 | 63  37 |
| Age   Median (years, range)  18-30  31-45  46-60  61-70 | 49 (34-69)  0  17  45  13 | 0  23  60  17 |
| Histology (Gastrointestinal)  Upper GI tract  Hepatopancreaticobiliary  Lower GI tract | 5  19  51 | 7  25  68 |
| Prior Systemic Treatments  Median (#, range)  None  One systemic therapy  Two systemic therapies  Three or more systemic therapies  Common melanoma agents*  High dose IL-2  αCTLA-4 (single agent)  αPD-1 (single agent)  αCTLA-4/ αPD-1 (combination)  IFNα (adjuvant)  Common systemic GI agents*  5-Fluorouracil**  Oxaliplatin  Irinotecan  Bevacizumab  Gemcitabine  Cisplatin  Paclitaxel  Cetuximab  Trifluridine/tipiracil | 3 (1-11)  0  9  21  45  - - -  - -  68  59  47  43  18  9  8  8  7 | 0  12  28  60  -  -  -  -  -  91  79  63  57  24  12  11  11  9 |
| Site of TIL harvest  Lung  Liver  Other Intraabdominal  Lymph Node  Subcutaneous/Soft Tissue | 48  11  7  6  3 | 64  14  9  8  4 |

*Common = agents utilized (alone or in combination) in ~10% of study population

** includes oral and hepatic pump variations
